# Supplementary material for: Isolation and Molecular Characterization of the Romaine Lettuce Phylloplane Mycobiome
Source: J Fungi (Basel). 2021 Apr 7;7(4):277. doi: 10.3390/jof7040277 (PMC8067711; doi:10.3390/jof7040277)
Supplement: Supplementary file 1 [file jof-07-00277-s001.xlsx]

## Sheet: Sheet1
D. Haelewaters et al. Isolation and molecular characterization of the romaine lettuce phylloplane mycobiome
Supplementary Table S1: GenBank accession numbers of ex-type strains used in core community datasets
Dataset	GenBank acc. no.	Genus	Species epithet	Strain or Contig	Outgroup	Comment
Aureobasidium	KM093738	Aureobasidium	iranianum	CCTU:268
Aureobasidium	JN712489	Aureobasidium	leucospermi	CPC:15180
Aureobasidium	MH854694	Aureobasidium	lini	CBS:125.21
Aureobasidium	NR_159598	Aureobasidium	melanogenum	CBS:105.22
Aureobasidium	NR_147362	Aureobasidium	namibiae	CBS:147.97
Aureobasidium	KT693733	Aureobasidium	pullulans	CBS:584.75
Aureobasidium	MG589215	Aureobasidium	pullulans	HU9199
Aureobasidium		Aureobasidium	pullulans	C_0070
Aureobasidium	KT693735	Aureobasidium	subglaciale	CBS:123387
Aureobasidium		Aureobasidium	subglaciale	C_0104
Aureobasidium	NR_147337	Aureobasidium	thailandense	NRRL:58539
Aureobasidium	NR_121524	Kabatiella	bupleuri	CBS:131304
Aureobasidium	NR_156560	Pseudoseptoria	collariana	CBS:135104	*
Aureobasidium	NR_160075	Selenophoma	linicola	CBS:468.48	*
Cladospororium	NR_121315	Cercospora	beticola	CBS:116456	*
Cladospororium	MH863861	Cladosporium	acalyphae	CBS:125982
Cladospororium	NR_152294	Cladosporium	aciculare	CBS:140488
Cladospororium	NR_152300	Cladosporium	aggregatocicatricatum	CBS:140493
Cladospororium	MH863862	Cladosporium	angustisporum	CBS:125983
Cladospororium	NR_120010	Cladosporium	aphidis	CPC:13204
Cladospororium	AF393694	Cladosporium	colocasiae	ATCC:200944
Cladospororium	NR_119729	Cladosporium	colombiae	CBS:274.80B
Cladospororium	NR_156279	Cladosporium	cycadicola	CBS:137970
Cladospororium	NR_156348	Cladosporium	domesticum	CPC:22307
Cladospororium	NR_158360	Cladosporium	endophytica	MFLUCC:17-0599
Cladospororium	MH863865	Cladosporium	exasperatum	CBS:125986
Cladospororium	NR_119845	Cladosporium	funiculosum	ATCC:38010
Cladospororium	MH863124	Cladosporium	herbarum	CBS:121621
Cladospororium	EU167591	Cladosporium	iridis	CBS:138.40
Cladospororium	KT600397	Cladosporium	limoniforme	CPC:12039
Cladospororium	MF473142	Cladosporium	needhamense	CPC:22353
Cladospororium	MH865096	Cladosporium	phaenocomae	CBS:128769
Cladospororium	KX938394	Cladosporium	prolongatum	CGMCC3:18036
Cladospororium	NR_152298	Cladosporium	puyae	CBS:274.80A
Cladospororium	NR_152299	Cladosporium	rhusicola	CBS:140492
Cladospororium		Cladosporium	sp. 1	C_0005
Cladospororium		Cladosporium	sp. 2	C_0006
Cladospororium		Cladosporium	sp. 3	C_0014
Cladospororium		Cladosporium	sp. 5	C_0009
Cladospororium		Cladosporium	sp. 5	C_0009b
Cladospororium	GenBank	Cladosporium	sp. 6	HU9304
Cladospororium		Cladosporium	sp. 7	C_0224
Cladospororium	AY361958	Cladosporium	sphaerospermum	ATCC:11289
Cladospororium	GenBank	Cladosporium	sphaerospermum	HU9302
Cladospororium	NR_148193	Cladosporium	subcinereum	UTHSC:DI-13-257
Cladospororium	MH863129	Cladosporium	subinflatum	CBS:121630
Cladospororium	MH863130	Cladosporium	tenellum	CBS:121634
Cladospororium	MH864840	Cladosporium	tenuissimum	CBS:125995
Cladospororium	EF679403	Cladosporium	variabile	CBS:121635
Cladospororium	MH863875	Cladosporium	xylophilum	CBS:125997
Filobasidium	NR_144813	Cryptococcus	ater	ATCC:14247
Filobasidium	KY103413	Filobasidium	chernovii	CBS:8679
Filobasidium	MG589267	Filobasidium	chernovii	HU9055
Filobasidium	NR_119429	Filobasidium	floriforme	CBS:6241
Filobasidium	MG589199	Filobasidium	aff. floriforme sp. 1	HU9229
Filobasidium	NR_119453	Filobasidium	globisporum	CBS:7642
Filobasidium	KY103433	Filobasidium	magnum	CBS:140
Filobasidium		Filobasidium	magnum	C_0053
Filobasidium	MG589160	Filobasidium	cf. magnum	HU9127
Filobasidium	NR_077106	Filobasidium	oeirense	CBS:8681
Filobasidium		Filobasidium	oeirense	C_0071
Filobasidium	NR_111207	Filobasidium	stepposum	CBS:10265
Filobasidium		Filobasidium	stepposum	C_0016
Filobasidium	KY103442	Filobasidium	uniguttulatum	CBS:1730
Filobasidium	KY103446	Filobasidium	wieringae	CBS:1937
Filobasidium	MG589200	Filobasidium	wieringae	HU9224
Filobasidium	KY104322	Naganishia	bhutanensis	CBS:6294
Filobasidium	NR_111118	Naganishia	randhawae	CBS:10160
Filobasidium	KF861792	Naganishia	vaughanmartiniae	DBVPG:4736
Filobasidium	NR_073229	Piskurozyma	capsuligena	CBS:1906	*
Filobasidium	NR_155681	Piskurozyma	silvicola	CBS:10099	*
Naganishia	NR_073225	Heterocephalacria	arrabidensis	CBS:8678	*
Naganishia	NR_111050	Naganishia	adeliensis	CBS:8351
Naganishia	NR_111046	Naganishia	albida	CBS:142
Naganishia	NR_077113	Naganishia	albidosimilis	JCM:8843
Naganishia	NR_111049	Naganishia	antarctica	CBS:7687
Naganishia	NR_077082	Naganishia	bhutanensis	ATCC:22461
Naganishia	NR_111371	Naganishia	cerealis	CBS:10505
Naganishia	NR_111051	Naganishia	diffluens	CBS:160
Naganishia	NR_111047	Naganishia	friedmannii	CBS:7160
Naganishia	KY104331	Naganishia	globosa	CBS:1975
Naganishia	NR_073220	Naganishia	liquefaciens	CBS:968
Naganishia	MG589247	Naganishia	liquefaciens	HU9043
Naganishia	NR_152962	Naganishia	onofrii	DBVPG:5303
Naganishia	MG852088	Naganishia	qatarensis	QCC:Y17-17
Naganishia	NR_111118	Naganishia	randhawae	CBS:10160
Naganishia	NR_073219	Naganishia	uzbekistanensis	CBS:8683
Naganishia	NR_152985	Naganishia	vaughanmartiniae	CBS:13731
Naganishia	NR_111045	Naganishia	vishniacii	CBS:7110
Papiliotrema	NR_130674	Papiliotrema	anemochoreius	CBS:10258
Papiliotrema	LK023827	Papiliotrema	baii	PYCC:6523
Papiliotrema	NR_121465	Papiliotrema	bandonii	CBS:9107
Papiliotrema	NR_130696	Papiliotrema	flavescens	CBS:942
Papiliotrema	NR_119972	Papiliotrema	fonsecae	EX:F-4087
Papiliotrema	KU504588	Papiliotrema	fonsecae	ZM13F84		No ex-type sequence!
Papiliotrema	MG589165	Papiliotrema	cf. fonsecae	HU9258, C_0205
Papiliotrema	MG589166	Papiliotrema	cf. fonsecae	HU9267, C_0205
Papiliotrema	GU997162	Papiliotrema	frias	CRUB:1250
Papiliotrema	MG589203	Papiliotrema	frias	HU9177
Papiliotrema	NR_111084	Papiliotrema	fusca	PYCC:5690
Papiliotrema	NR_155613	Papiliotrema	japonica	CBS:2013
Papiliotrema	KY104469	Papiliotrema	laurentii	CBS:139
Papiliotrema	KP203864	Papiliotrema	leoncinii	UFMG:CM-Y374
Papiliotrema	KY102795	Papiliotrema	mangalensis	CBS:10870
Papiliotrema	AF444387	Papiliotrema	miconiae	CBS:8358
Papiliotrema	AF472628	Papiliotrema	nemorosa	VKM:Y-2906
Papiliotrema	NR_156605	Papiliotrema	odontotermitis	CBS:14181
Papiliotrema	NR_137653	Papiliotrema	perniciosa	VKM:Y-2905
Papiliotrema	AB915388	Papiliotrema	phichitensis	CBS:13390
Papiliotrema	NR_164566	Papiliotrema	plantarum	DMKU:CP801
Papiliotrema	NR_073231	Papiliotrema	pseudoalba	CBS:7227
Papiliotrema	NR_155678	Papiliotrema	rajasthanensis	CBS:10406
Papiliotrema	LK023825	Papiliotrema	ruineniae	PYCC:6170
Papiliotrema	NR_155608	Papiliotrema	siamensis	DMKU:SP85
Papiliotrema	KY104475	Papiliotrema	taeanensis	CBS:9742
Papiliotrema	NR_073350	Papiliotrema	terrestris	CBS:10810
Papiliotrema	NR_160324	Papiliotrema	wisconsinensis	CBS:13895
Papiliotrema	KY104929	Rhynchogastrema	aquatica	CBS:12527	*
Papiliotrema	NR_111476	Rhynchogastrema	complexa	CBS:11570	*
Papiliotrema	KY104932	Rhynchogastrema	glucofermentans	CBS:10381	*
Rhodotorula	NR_155729	Rhodosporidiobolus	azoricus	CBS:8949	*
Rhodotorula	NR_073290	Rhodosporidiobolus	microsporus	CBS:7041	*
Rhodotorula	NR_153197	Rhodotorula	alborubescens	JCM:5352
Rhodotorula	NR_073277	Rhodotorula	araucariae	CBS:6031
Rhodotorula	NR_077096	Rhodotorula	babjevae	CBS:7808
Rhodotorula	NR_073271	Rhodotorula	diobovata	CBS:6085
Rhodotorula	NR_137709	Rhodotorula	evergladensis	CBS:10880
Rhodotorula	NR_073287	Rhodotorula	fragaria	CBS:6254
Rhodotorula	NR_073294	Rhodotorula	glutinis	CBS:20
Rhodotorula	MG589248	Rhodotorula	aff. glutinis sp. nov. 1	HU9099
Rhodotorula	MG589204	Rhodotorula	aff. glutinis sp. nov. 2	HU9231
Rhodotorula	NR_073273	Rhodotorula	graminis	CBS:2826
Rhodotorula	NR_073282	Rhodotorula	kratochvilovae	CBS:7436
Rhodotorula	KY104864	Rhodotorula	matritensis	CBS:8054
Rhodotorula	KY104871	Rhodotorula	mucilaginosa	CBS:8161
Rhodotorula	NR_153298	Rhodotorula	ngohengohe	ICMP:22106
Rhodotorula	NR_073292	Rhodotorula	nothofagi	CBS:8166
Rhodotorula	AB026006	Rhodotorula	pacifica	CBS:10070
Rhodotorula	NR_073265	Rhodotorula	paludigena	CBS:6566
Rhodotorula	NR_073269	Rhodotorula	sphaerocarpa	CBS:5939
Rhodotorula	NR_153295	Rhodotorula	toruloides	CBS:6016
Rhodotorula	GenBank	Rhodotorula	sp. nov. 3	HU9305
Sampaiozyma	NR_073329	Leucosporidium	creatinivorum	CBS:8620	*
Sampaiozyma	KY104017	Leucosporidium	drummii	CBS:11562	*
Sampaiozyma	NR_155310	Leucosporidium	escuderoi	CBS:12734	*
Sampaiozyma	NR_073276	Leucosporidium	fellii	CBS:7287	*
Sampaiozyma	KY104019	Leucosporidium	golubevii	CBS:9651	*
Sampaiozyma	NR_073286	Leucosporidium	muscorum	CBS:6921	*
Sampaiozyma	NR_155332	Leucosporidium	yakuticum	CBS:8621	*
Sampaiozyma	NR_111080	Sampaiozyma	ingeniosa	CBS:4240
Sampaiozyma	KY105310	Sampaiozyma	vanillica	CBS:7404
Sampaiozyma	MG589231	Sampaiozyma	sp. nov. 1	HU9046
Sampaiozyma	GenBank	Sampaiozyma	sp. nov. 2	HU9301
Sporobolomyces	KY104692	Rhodosporidiobolus	azoricus	CBS:8949	*
Sporobolomyces	KY104696	Rhodosporidiobolus	fluvialis	CBS:6568	*
Sporobolomyces	KY104718	Rhodotorula	araucariae	CBS:6031	*
Sporobolomyces	KY104768	Rhodotorula	diobovata	CBS:6085	*
Sporobolomyces	KY104779	Rhodotorula	glutinis	CBS:20	*
Sporobolomyces	NR_073282	Rhodotorula	kratochvilovae	CBS:7436	*
Sporobolomyces	KY104874	Rhodotorula	mucilaginosa	CBS:316	*
Sporobolomyces	KY104890	Rhodotorula	paludigena	CBS:6566	*
Sporobolomyces	KY105506	Sporobolomyces	bannaensis	CBS:9204
Sporobolomyces	NR_137663	Sporobolomyces	beijingensis	CGMCC:2.2365
Sporobolomyces	KY105507	Sporobolomyces	blumeae	CBS:9094
Sporobolomyces	KY105508	Sporobolomyces	carnicolor	CBS:4215
Sporobolomyces	NR_155844	Sporobolomyces	japonicus	CBS:5744
Sporobolomyces	NR_137664	Sporobolomyces	jilinensis	CGMCC:2.2301
Sporobolomyces	KY105513	Sporobolomyces	johnsonii	CBS:5470
Sporobolomyces	KY105518	Sporobolomyces	koalae	CBS:10914
Sporobolomyces	NR_155773	Sporobolomyces	longiusculus	PYCC:5818
Sporobolomyces	KY105519	Sporobolomyces	nakasei	CBS:9203
Sporobolomyces	KY105521	Sporobolomyces	patagonicus	CBS:9657
Sporobolomyces	KY105522	Sporobolomyces	phaffii	CBS:9129
Sporobolomyces	KY105472	Sporobolomyces	roseus	CBS:7683		As sporidiobolus metaroseus
Sporobolomyces	KY105527	Sporobolomyces	ruberrimus	CBS:7500
Sporobolomyces	KY105530	Sporobolomyces	salmoneus	CBS:488
Sporobolomyces	KY105498	Sporobolomyces	salmonicolor	CBS:490		As Sporidiobolus salmonicolor
Sporobolomyces	NR_155770	Sporobolomyces	shibatanus	CBS:491		As Sporidiobolus pararoseus
Sporobolomyces	MG470896	Sporobolomyces	sp. nov. 1	HU9138
Sporobolomyces		Sporobolomyces	sp. nov. 2	C_0008
Sporobolomyces		Sporobolomyces	sp. nov. 2	C_0008b
Sporobolomyces		Sporobolomyces	sp. nov. 2	C_0008d
Sporobolomyces		Sporobolomyces	sp. nov. 2	C_0008f
Sporobolomyces		Sporobolomyces	sp. nov. 2	C_0008h
Sporobolomyces	MG470901	Sporobolomyces	sp. nov. 2	HU9155
Sporobolomyces	MG470913	Sporobolomyces	sp. nov. 2	HU9204
Sporobolomyces	MG470929	Sporobolomyces	sp. nov. 2	HU9257
Symmetrospora	AF444523	Buckleyzyma	armeniaca	CBS:8076
Symmetrospora	AF444538	Buckleyzyma	aurantiaca	CBS:317
Symmetrospora	AF444544	Buckleyzyma	kluyveri-nielii	CBS:7168
Symmetrospora	AF444522	Erythrobasidium	hasegawianum	CBS:8253
Symmetrospora	AB030353	Erythrobasidium	yunnanense	JCM:10687
Symmetrospora	DQ911616	Naohidea	sebacea	CBS:8477	*	No ex-type sequence!
Symmetrospora	KY105570	Symmetrospora	coprosmae	CBS:7899
Symmetrospora	KY105571	Symmetrospora	foliicola	CBS:8075
Symmetrospora	AF444578	Symmetrospora	gracilis	CBS:71
Symmetrospora	AF444504	Symmetrospora	marina	CBS:2365
Symmetrospora	AF444546	Symmetrospora	oryzicola	CBS:7228
Symmetrospora	KJ701216	Symmetrospora	pseudomarina	PUL:SA716
Symmetrospora	KJ701206	Symmetrospora	suhii	PUL:BG 02-5-27-3-2-2
Symmetrospora	KY105573	Symmetrospora	symmetrica	CBS:9727
Symmetrospora	KY105574	Symmetrospora	vermiculata	CBS:9092
Symmetrospora	MN586903	Symmetrospora	sp. nov.	HU9059
Symmetrospora	MN586904	Symmetrospora	sp. nov.	HU9256
Vishniacozyma	MF076904	Phaeotremella	eugeniae	LE:303429	*
Vishniacozyma	NR_158848	Phaeotremella	fimbriata	O:Spirin 11139	*
Vishniacozyma	KY105817	Vishniacozyma	carnescens	CBS:973
Vishniacozyma		Vishniacozyma	carnescens	C_0001
Vishniacozyma	MG589169	Vishniacozyma	carnescens	HU9254
Vishniacozyma	KY105820	Vishniacozyma	dimennae	CBS:5770
Vishniacozyma	LC514945	Vishniacozyma	ellesmerensis	JCM:32573
Vishniacozyma	MK050335	Vishniacozyma	europaea	CGMCC:2.3099
Vishniacozyma	NR_144809	Vishniacozyma	foliicola	CGMCC:2.2471
Vishniacozyma		Vishniacozyma	cf. foliicola	C_0038
Vishniacozyma	MG589249	Vishniacozyma	cf. foliicola	HU9045
Vishniacozyma	KY105823	Vishniacozyma	globispora	CBS:6981
Vishniacozyma	NR_77070	Vishniacozyma	heimaeyensis	CBS:8933
Vishniacozyma	MK050330	Vishniacozyma	melezitolytica	CGMCC:2.3472
Vishniacozyma	KY105826	Vishniacozyma	peneaus	CBS:2409
Vishniacozyma	MK050333	Vishniacozyma	pseudopenaeus	CGMCC:2.3165
Vishniacozyma	NR_111656	Vishniacozyma	psychrotolerans	EX:F-1583
Vishniacozyma	KY105827	Vishniacozyma	taibaiensis	CBS:9919
Vishniacozyma	NR_144812	Vishniacozyma	tephrensis	CBS:8935
Vishniacozyma	MG589173	Vishniacozyma	tephrensis	HU9122
Vishniacozyma	MH809977	Vishniacozyma	victoriae	ATCC:MYA-305
Vishniacozyma		Vishniacozyma	victoriae	C_0010
Vishniacozyma	MG589175	Vishniacozyma	victoriae	HU9126
Vishniacozyma	MG589180	Vishniacozyma	victoriae	HU9242
Vishniacozyma	MG589172	Vishniacozyma	aff. heimaeyensis sp. nov.	HU9248
